# Supplementary material
Source: Springer Nature journal article supplement (https://www.springermedizin.de/resource/supplementary/13058_2013_3270_MOESM7_ESM.pdf/9703706)

**A**MDA-MB-231  
shCTLMDA-MB-231  
shSRBI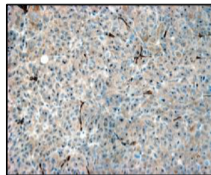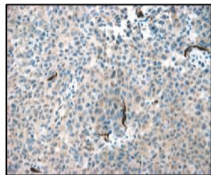

CD-31

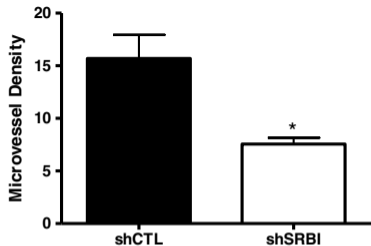**B**MDA-MB-231  
shCTLMDA-MB-231  
shSRBI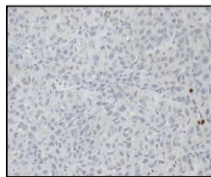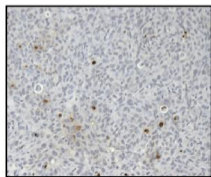

TUNEL

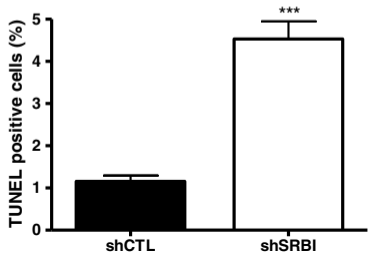

Supplement: MOESM7 [file 9703706]
